# Supplementary material for: Anomalous photovoltaic effect based on molecular chirality: influence of enantiomeric purity on the photocurrent response in π-conjugated ferroelectric liquid crystals
Source: Royal Society of Chemistry journal article supplement (doi:10.1039/c7cp02624b), 2017-01-01
Supplement: c7cp02624b1.pdf [file c7cp02624b1.pdf]

**The anomalous photovoltaic effect based on molecular chirality:  
the influence of the enantiomer purity on the photocurrent response  
in  $\pi$ -conjugated ferroelectric liquid crystals**

Atsushi Seki, Yusuke Funatsu and Masahiro Funahashi\*

*Department of Advanced Materials Science, Faculty of Engineering, Kagawa University,  
2217-20 Hayashi-cho, Takamatsu, Kagawa, 761-0396, Japan.*

*E-mail: m-funa@eng.kagawa-u.ac.jp; Fax: (+81)-87-864-2411; Tel: (+81)-87-864-2411.*

## POM images of (S)-1

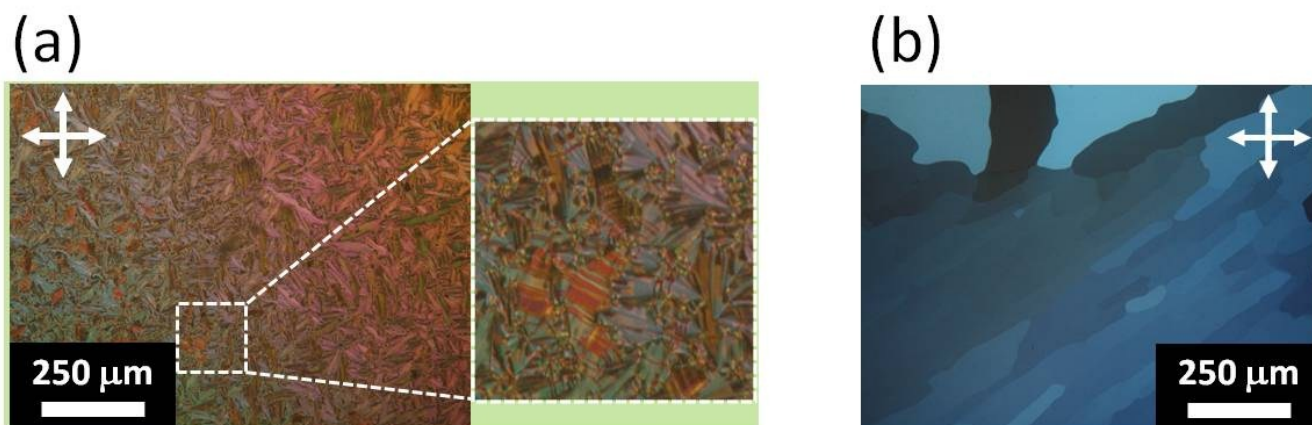

**Figure S-1.** POM images of (a) the SmC\* phase (125 °C) and (b) the SmG\* phase (50 °C) of (S)-1 on cooling between two glass substrates. The inset is a magnified image of the SmC\* phase at 125 °C. (These are magnified images of Figure 4.)

## Molecular reorientation behaviors induced by electric field for (S)-1

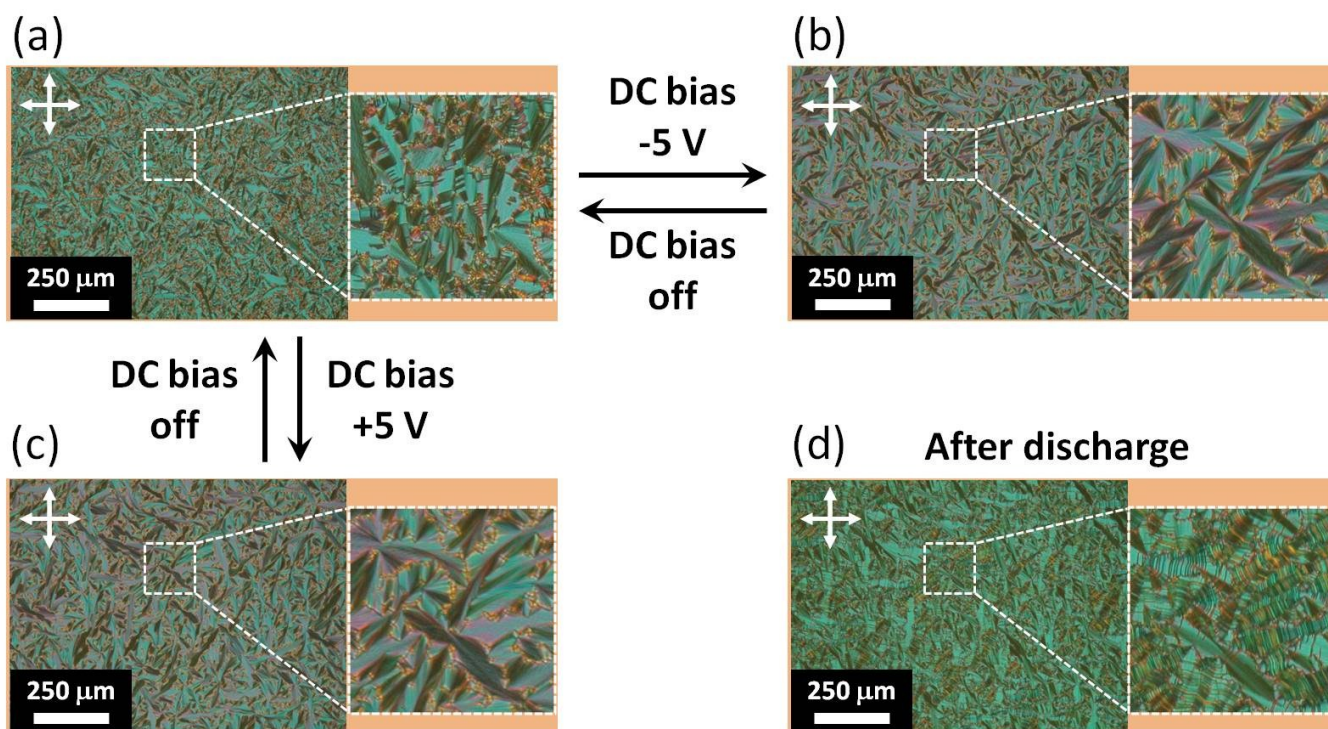

**Figure S-2.** POM images of the SmC\* phase (127 °C) in a 2 μm-thick cell filled with (S)-1: (a) after cooling from the Iso phase without DC bias, (b) under application of a negative DC bias (-5 V), (c) under application of a positive DC bias (+5 V), and (d) after discharge. (These are magnified images of Figure 5.)

### Characterization of mesomorphic properties for (*rac*)-1

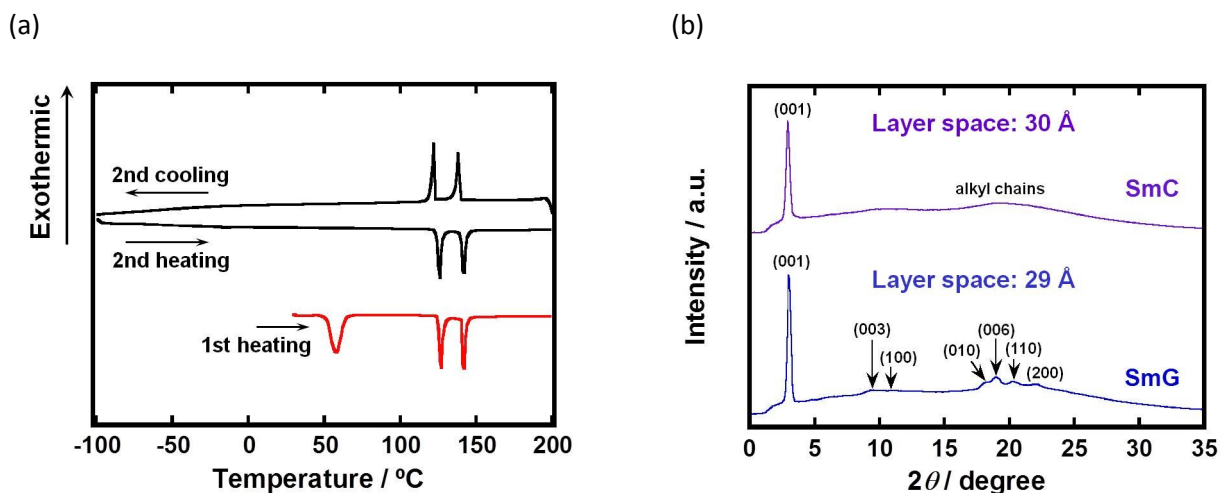

**Figure S-3.** (a) DSC thermograms of (*rac*)-1 (Scanning rates: 10 K/min. The red curves exhibit thermograms of obtained materials from recrystallization.); (b) XRD patterns in the LC phases of (*rac*)-1 on cooling process (Upper: at 126 °C in the SmC phase, bottom: at 100 °C in the SmG phase).

### Molecular reorientation behaviors induced by electric field for (*rac*)-1

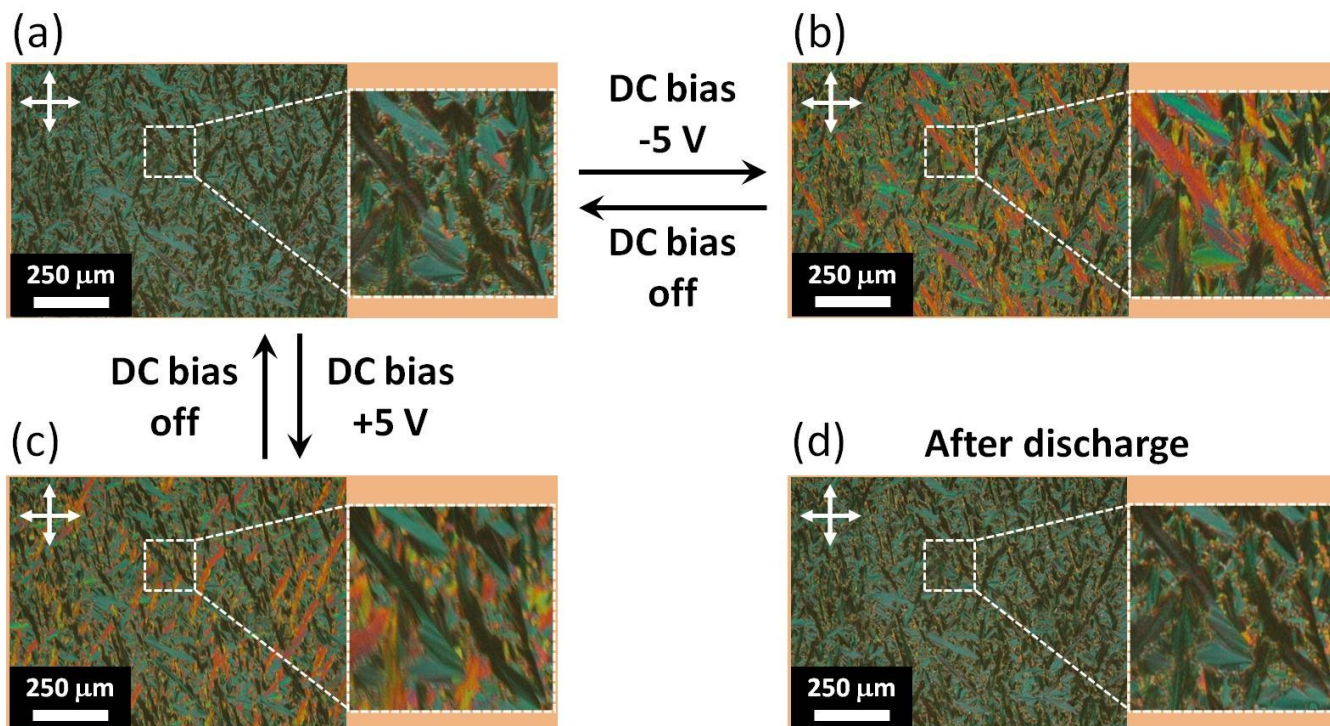

**Figure S-4.** POM images of the SmC phase (127 °C) in a 2-μm thick cell filled with (*rac*)-1: (a) after cooling from the Iso phase without DC bias, (b) under application of a negative DC bias (-5 V), (c) under application of a positive DC bias (+5 V), and (d) after discharge. (These are magnified images of Figure 8.)

## Electric-field-dependence of hole mobilities

(a) (S)-1

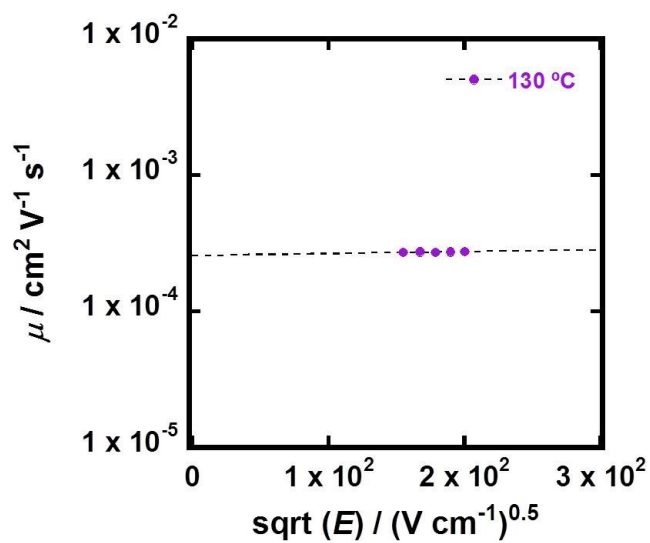

(b) (rac)-1

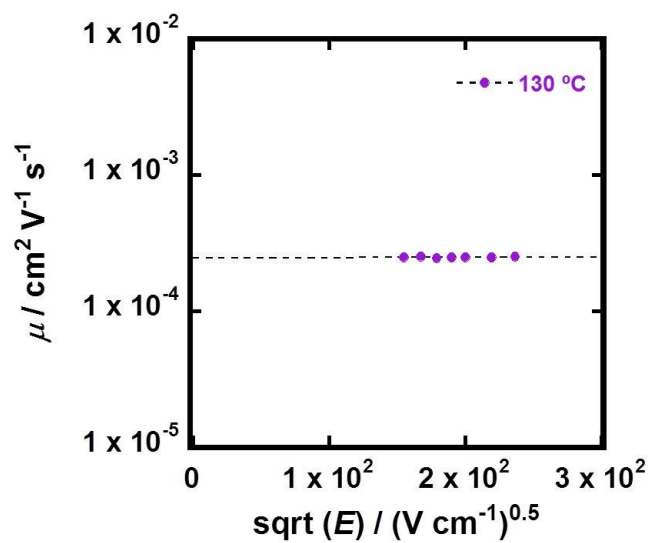

**Figure S-5.** Hole mobilities as a function of the square root of electric field in (a) the SmC\* phase of (S)-1 and (b) the SmC phase of (rac)-1.

## Temperature-dependence of hole mobilities

(a) (S)-1

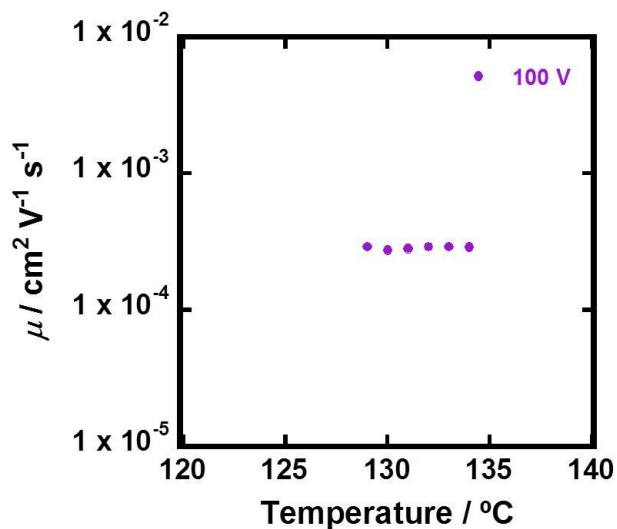

(b) (rac)-1

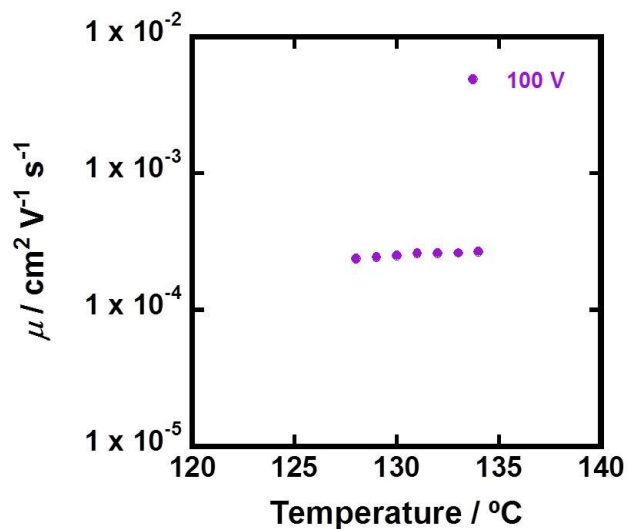

**Figure S-6.** Hole mobilities as a function of temperature in (a) the SmC\* phase of (S)-1 and (b) the SmC phase of (rac)-1.

## Frequency-dependence of dielectric hysteresis behavior in the SmC\* phase of (S)-1

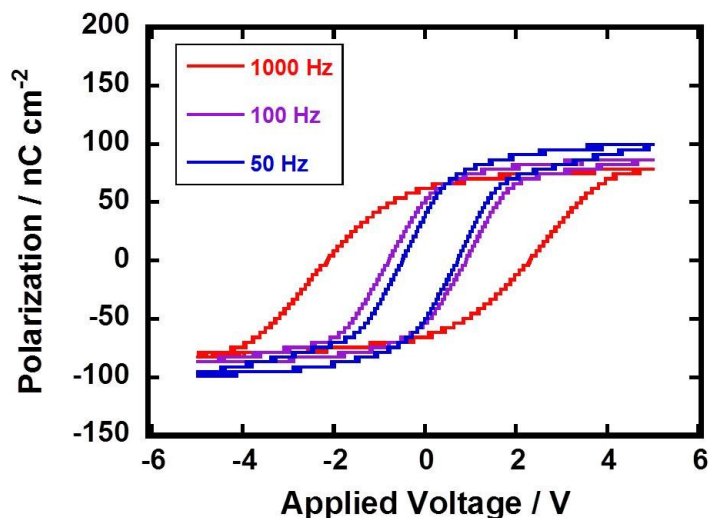

Figure S-7. Dielectric hysteresis loops in the SmC\* (SmC) phase (130 °C) of (S)-1.

## APV response of the 2- $\mu\text{m}$ gap LC sample in their SmC\*/SmC phases

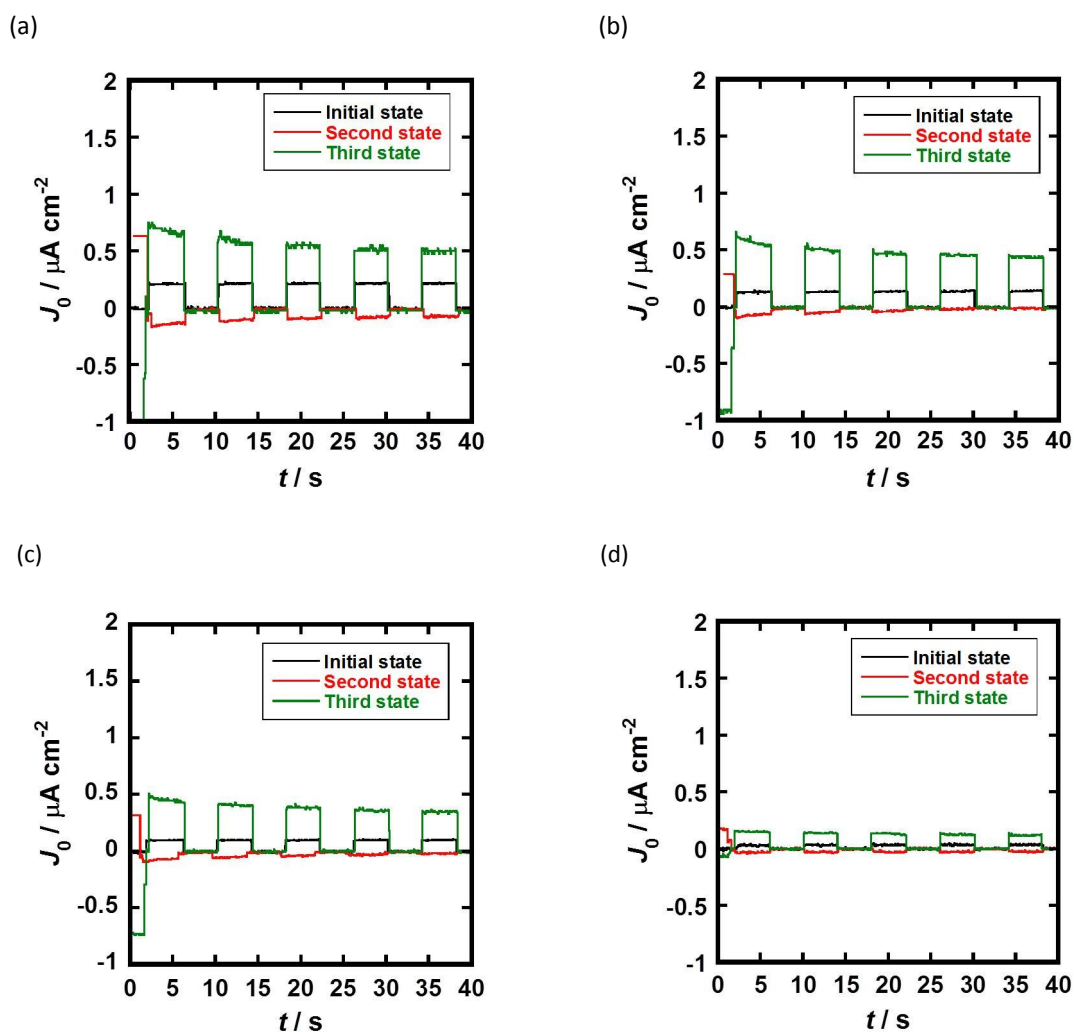

Figure S-8. Steady state photocurrent response profiles at 127 °C for (a) 1R10S-1, (b) 1R6S-1, (c) 1R2S-1, and (d) (rac)-1, (b) The measurements were performed using ITO/ITO sandwich cells whose thickness was 2  $\mu\text{m}$ . The APV current density ( $J_0$ ) is determined as APV photocurrent density at zero external bias.
